# Supplementary material for: Description of network meta-analysis geometry: A metrics design study
Source: PLoS One. 2019 Feb 20;14(2):e0212650. doi: 10.1371/journal.pone.0212650 (PMC6382117; doi:10.1371/journal.pone.0212650)
Supplement: S2 File — (DOCX) [file pone.0212650.s002.docx]

**S2 File. Metrics to describe NMAs.**

| **Metrics*** | **Formula** |
| --- | --- |
| **Graph** |  |
| **Total degree** |  |
| **Average degree** | Also being expressed as: |
| **Average weighted degree** | Which means: |
| **Density** |  |
| **Percentage common comparator**** |  |
| **Percentage strong edges**** |  |
| **Mean thickness**** | Which means: |
| **Median thickness**** |  |
| **Average path length** |  |
| N = number of nodes of a NMA;  E = number of edges of a NMA;  Studies = number of studies included in the NMA;  IQR: interquartile range  *All parameters and metrics were adapted from previous studies on social network analysis, graph theory (1-4). **Novel metrics especially created to support the report of NMAs geometry. | |

**References**

1. Opsahl T, Agneessens F, Skvoretz J**.** Node centrality in weighted networks: Generalizing degree and shortest paths. Social Networks. 2010;32(245).

2. Otte E, Rousseau R**.** Social network analysis: a powerful strategy, also for the information sciences. Journal of Information Science. 2002;28(6):441-53.

3. Wasserman S, Faust K**.** Social Network Analysis: Methods and Applications: Cambridge: Cambridge University Press; 1994.

4. Arif T**.** The Mathematics of Social Network Analysis: Metrics for Academic Social Networks. International Journal of Computer Applications Technology and Research. 2015;4(12):889-93.
